1 **The most recent common ancestor for Y chromosome lived**  
2 **about 3.67 million years ago**

3  
4 Tingting Sun<sup>1</sup>, Qing Liu<sup>1</sup>, Meiqi Shang<sup>1</sup>, Kejian Wang<sup>1\*</sup>

5  
6 <sup>1</sup>State Key Laboratory of Rice Biology, China National Rice Research  
7 Institute, Chinese Academy of Agricultural Sciences, Hangzhou, China

8  
9 \*Correspondence: Kejian Wang, Email: wangkejian@caas.cn

10

11 **Key words:** mtDNA, Y-DNA, most recent common ancestor, modern *Homo*  
12 *sapiens*

13

14 **Author's note:** The manuscript has not been peer-reviewed. Any comments,  
15 suggestions and criticisms will be greatly appreciated.

16 **Abstract**

17 **The origin of human beings is one of the most important questions in**  
18 **science. A combination of numerous archaeological and genomic**  
19 **analyses has led to the widely accepted opinion that modern humans are**  
20 **the descendants of anatomically modern *Homo sapiens* that originated**  
21 **in Africa about 200 thousand years ago (KYA)<sup>1,2</sup>. In this study, we**  
22 **reanalysed the mitochondrial DNA and Y chromosome DNA of the 1000**  
23 **Genomes Project<sup>3</sup>, and found many minority-specific single-nucleotide**  
24 **polymorphisms. Using these polymorphisms, we recalculated the time**  
25 **taken for the evolution of modern humans. Analysis of mitochondrial**  
26 **DNA suggested that the most recent common female ancestor lived**  
27 **about 400 KYA and began to leave Africa about 180 KYA. In contrast,**  
28 **analysis of Y chromosome DNA revealed that the most recent common**  
29 **male ancestor lived about 3.67 million years ago (MYA) and began to**  
30 **migrate out of Africa about 2.05 MYA, a time which is consistent with**  
31 **the expansion time of *Homo erectus* identified by archaeological**  
32 **research. Based on the findings, we proposed a new migration routes**  
33 **and times of modern human, and speculated that anatomically modern**  
34 ***Homo sapiens* has been extensively interbred with local archaic human**  
35 **population during their dispersal across the globe.**

36

37 The origin of humans is a topic of a large amount of research and  
38 discussion. Data from archaeological sites have led to the widely accepted  
39 view that humans originated in Africa, and have migrated out of Africa at  
40 least three times<sup>4-7</sup>. About 2–1.7 million years ago (MYA), *Homo erectus*  
41 spread to other continents, shortly after emerging in Africa<sup>4,8,9</sup>. The second  
42 expansion, the migration of ancestors of Neanderthals into Europe, occurred  
43 around 0.8–0.6 MYA, and the third wave was the dispersal of anatomically  
44 modern *Homo sapiens* about 130–90 thousand years ago (KYA)<sup>10,11</sup>. With  
45 the development of molecular anthropology, mitochondrial DNA (mtDNA)

46 and Y chromosome DNA (Y-DNA), both of which are inherited in a haploid  
47 manner, have been extensively used to analyse the origins of modern  
48 humans<sup>1,2,12,13</sup>. Studies of mtDNA have shown that all human beings are  
49 descendants of a common female ancestor who lived about 200 KYA in  
50 Africa. Her descendants migrated out of Africa around 100 KYA<sup>2,8,14</sup>.  
51 Y-DNA can be used to trace the male lineage. Early Y-DNA evidence  
52 suggested that the common male ancestor of modern humans lived in Africa  
53 about 150–60 KYA<sup>15-17</sup>. However, recent analyses of 1,244 Y chromosomes  
54 have led to speculation that the paternal ancestors lived about 190 KYA and  
55 left Africa about 100 KYA<sup>1,8</sup>. Combining archaeological and genetic studies,  
56 it is now widely accepted that anatomically modern humans left Africa  
57 about 130–90 KYA and then spread throughout the world, resulting in the  
58 global replacement and genetic extinction of pre-existing local archaic  
59 human populations<sup>8,18</sup>.

60 Single-nucleotide polymorphisms (SNPs) are the most common type of  
61 polymorphism, involving variation of a single base pair. As the introduction  
62 of new SNPs occurs at a constant rate, common SNPs have been widely  
63 used to determine the time of common ancestor of different haplogroups  
64 over the course of human evolution<sup>2,17</sup>. However, until recently, only a very  
65 limited number of individuals had been sequenced and analysed. We  
66 speculated that each individual sequenced might contain a certain number of  
67 minority-specific variations, which will be classified as low-frequency SNPs  
68 (less than 1% or 5% of the population) and discarded in the study of  
69 population genetics and evolutionary biology<sup>19,20</sup>. To test this hypothesis, we  
70 reanalysed the highly accurate single nucleotide variants of 2,534 human  
71 individuals released by the 1000 Genomes Project<sup>1,3</sup>. We first analysed the  
72 SNPs present in mtDNA (about 14 kb, specific location: 489 bp–14,783 bp).  
73 There were 2,474 SNPs in the mtDNA of the 2,534 individuals. Of these  
74 SNPs, 2,037 (82%) were present in fewer than ten individuals (accounting  
75 for 0.36% of individuals analysed), and 926 (37%) SNPs were specific to a

76 single individual (Figure 1a). There were 48,226 SNPs found in Y-DNA  
77 (approximately 25 Mb, 2,762,077 bp–28,508,881 bp) from 1,233 male  
78 individuals. Of these SNPs, 40,576 (84%) were present in fewer than ten  
79 individuals (accounting for 0.73% of male individuals analysed), and 27,127  
80 (56%) occurred in a single individual (Figure 1a). These results indicate the  
81 existence of a large number of minority-specific SNP sites, which are not  
82 likely to be analysed in population genetics.

83 Since new SNPs are introduced into the genome at a constant rate<sup>21</sup>, it can  
84 be inferred that each individual has a similar number of SNPs compared  
85 with the common ancestor. We further speculated that each individual also  
86 shares a similar number of SNP variations with a common out-group. To test  
87 the reliability of these minority-specific SNPs, we chose the genome of the  
88 chimpanzee as the common out-group because it was the closest living  
89 relatives of human beings and had similar mutation rate with human<sup>22</sup>. We  
90 found that each individual had a similar number of SNP differences with the  
91 chimpanzee analysed, with very limited variation in both mtDNA ( $541.36 \pm$   
92  $3.79$ ) and in Y-DNA ( $2979.15 \pm 26.41$ ) (Figure 1b). This observation  
93 indicates that the minority-specific SNPs are reliable.

94 Next, we reanalysed mtDNA and Y-DNA using all SNPs, including the  
95 minority-specific SNPs, and calculated the time to the Most Recent  
96 Common Ancestor (MRCA) using a simple model (Figure 2). The principle  
97 underlying the model is as follows. The number of SNP differences between  
98 the out-group (O) and A/B individuals or groups (the SNP differences  
99 between each individual and outgroup are calculated and then take the  
100 average) is proportional to twice the divergence time ( $T_m$ ) between the  
101 out-group and A/B. Similarly, the number of SNP differences between A and  
102 B is proportional to twice the differentiation time ( $T_n$ ) between A and B.  
103 When the split time between the human and the out-group is known, the  
104 differentiation time between A and B can be determined. The time is  
105 calculated according to the following formula:

$$106 \quad \frac{2T_n}{2T_m} = \frac{N_{AB}}{\frac{N_{AO} + N_{BO}}{2}}$$

107 To determine the time of major events affecting ancient humans, we first  
108 constructed a neighbour-joining tree using the mtDNA of one chimpanzee  
109 and all 2,534 individuals in the 1000 Genome Project<sup>3</sup>. The exact time of  
110 divergence between humans and chimpanzees remains subject to debate, and  
111 the most used time five million years was used in this study<sup>15</sup>. The  
112 evolutionary tree suggested that the common mtDNA ancestor of modern  
113 humans originated in Africa (Figure 3), which was in keeping with previous  
114 studies<sup>2,14</sup>. In the polygenetic tree, Node 1 represents the MRCA of all  
115 human individuals analysed. We calculated the time according to the above  
116 formula and found that the MRCA of modern humans lived about 400 KYA  
117 (Figure 3, Table 1 and Supplementary Table S1), which is about twice of the  
118 time deduced from previous haplogroup analysis<sup>2,14</sup>. From Node 2, we  
119 concluded that humans began to left Africa about 180 KYA, which is earlier  
120 than the widely accepted 130–90 KYA inferred from early archaeological  
121 and genomic studies<sup>8,23</sup>, but approximately coincides with recent  
122 archaeological findings of modern humans in the Misliya Cave in Israel,  
123 dated to ~180 KYA, and the Apidima Cave in Greece, dated to around 210  
124 KYA<sup>24,25</sup>. From Node 3, we inferred that the MRCA of all non-Africans also  
125 lived about 180 KYA, which is also earlier than the 90 KYA deduced from  
126 haplogroup analysis<sup>2</sup>. We also analysed the differentiation time of humans in  
127 other branches. We found that the mtDNA of Europeans began to split from  
128 that of West and South Asians (Node 12) at about 150 KYA, and their  
129 MRCA lived around 70–40 KYA (Node 15 and 16), which is close to the 45  
130 KYA discovered in archaeology<sup>26,27</sup>. We also found that the mtDNA of East  
131 Asians split from that of West and South Asians (Node 10) around 130 KYA,  
132 and their MRCA lived approximately 110–90 KYA (Node 7 and 11), which  
133 is in agreement with the earliest known modern humans discovered by  
134 archaeologists in southern China<sup>28</sup>, which have been dated to around 120–80

135 KYA. We found that mtDNA of Americans diverged from that of East  
136 Asians (Node 4, 6, 8 and 13) around 110–70 KYA, and their MRCA lived  
137 approximately 60–40 KYA (Node 5, 9 and 14), which is much earlier than  
138 the widely accepted date for human arrival in America of about 15 KYA<sup>29</sup>,  
139 but close to the 30 KYA deduced from a recently discovered Mexican  
140 cave<sup>30,31</sup>.

141 We further constructed a neighbour-joining tree using the Y-DNA of  
142 1,233 individuals and the chimpanzee (Figure 4). Using the same calculation,  
143 we found that the common patrilineal ancestors of modern humans (Node 1)  
144 arose in Africa about 3.67 MYA (Figure 4, Table 2 and Supplementary Table  
145 S2), which is nearly 20 times earlier than the 190 KYA estimated from  
146 recent haplogroup analysis<sup>1</sup>, and even older than that deduced from the  
147 archaeological record of *Homo habilis*, which arose about 3 MYA<sup>32</sup>. From  
148 Node 2, we inferred that the Y-DNA of modern humans began to migrate  
149 out of Africa approximately 2.05 MYA, which coincides with the  
150 archaeological dispersal time (2–1.7 MYA) of *Homo erectus*<sup>8,9</sup>. We found  
151 that the MRCA of non-African lineages (Node 3) lived about 1.54 MYA,  
152 which is about 15 times earlier than the 76 KYA produced by previous  
153 haplogroup analysis<sup>1</sup>. It appeared that the Y-DNA of East Asians began to  
154 split from that of West and South Asians (Node 4) around 0.97 MYA, and  
155 their MRCA lived about 0.91 MYA (Node 5). According to our analysis, the  
156 Y-DNA of Europeans split from that of West and South Asians (Node 8)  
157 around 0.66 MYA, which approximately coincides with the arrival time  
158 (0.8–0.6 MYA) of ancestor of Neanderthals in Europe<sup>9</sup>. We also inferred that  
159 the American patrilineal ancestors separated from West and South Asians  
160 (Node 6) at about 0.43 MYA, and the MRCA of native Americans lived  
161 about 0.31 MYA (Node 7).

162 Previous genomic evidence from mtDNA and Y-DNA suggested that the  
163 paternal and maternal ancestors of modern humans both lived within 200  
164 KYA, and migrated out of Africa about 100 KYA<sup>1,2,8</sup>. This time is roughly

165 consistent with the archaeologically determined time (130–90 KYA) of  
166 anatomically modern *Homo sapiens*<sup>10,33</sup>, but much later than that of archaic  
167 human populations, such as *Homo erectus* and archaic *Homo sapiens*<sup>4,34</sup>.  
168 Thus, it is now widely accepted that modern humans are the offspring of  
169 anatomically modern *Homo sapiens*, while pre-existing local archaic human  
170 populations became extinct with the arrival of modern *Homo sapiens*<sup>35</sup>. In  
171 this study, analysis of the mtDNA showed that the time of the female MRCA  
172 approximately corresponds with the rise of anatomically modern *Homo*  
173 *sapiens*, implying that the matrilineal ancestors of modern humans are likely  
174 to be anatomically modern *Homo sapiens*. However, analysis of the Y-DNA  
175 implied that the time of the male MRCA is even earlier than the time of  
176 *Homo habilis*. In addition, the time left Africa of male MRCA is consistent  
177 with that of *Homo erectus*. Based on the findings, we proposed a new  
178 migration routes and times of modern human (Figure 5). Furthermore, we  
179 speculated that anatomically modern *Homo sapiens* has been extensively  
180 interbred with local archaic human population during their dispersal across  
181 the globe. All modern humans inherited mtDNA from female anatomically  
182 modern *Homo sapiens* and Y-DNA from male archaic human population in  
183 different locations.

## 184 **Methods**

### 185 **Read mapping and SNP calling for out-group**

186 The sequencing of 24 chromosomes and the mitochondrial  
187 genome—chromosomes 2A and 2B merged into chromosome 2—of the  
188 chimpanzee ([GCF\\_002880755.1\\_Clint\\_PTRv2\\_genomic.fna](https://ftp.ncbi.nlm.nih.gov/genomes/all/GCF/002/880/755/GCF_002880755.1_Clint_PTRv2_genomic.fna)  
189 [https://ftp.ncbi.nlm.nih.gov/genomes/all/GCF/002/880/755/GCF\\_002880755.1\\_Clint\\_PTRv2\\_genomic.fna.gz](https://ftp.ncbi.nlm.nih.gov/genomes/all/GCF/002/880/755/GCF_002880755.1_Clint_PTRv2_genomic.fna.gz)) was  
190 simulated using ART software with the parameters ‘-l 150’, ‘-f 60’, ‘-m  
191 500’, ‘-s 10’, ‘-p’, ‘-na’ and ‘-ef’<sup>36</sup>. The high quality paired-end reads were  
192 aligned to the hs37d5 reference genome using BWA (v0.7.17) with the  
193 parameters: ‘mem -t 16 -k 32-M’<sup>37</sup>. PCR duplicates were removed using  
194 Picard tools (<http://broadinstitute.github.io/picard/>). We performed SNP  
195 calling using a HaplotypeCaller approach as implemented in the package  
196 GATK<sup>38</sup>. A Perl programme was used to filter potentially false SNPs using  
197 the following criteria: a homozygous genotype; supporting reads for the  
198 reference or alternative allele greater than 30; and the ratio of them was  
199 greater than 3.  
200

### 201 **Population genetic analysis**

202 Single-nucleotide polymorphism genotyping data available from the  
203 HapMap3 Project (Altshuler et al. 2010) was downloaded from the NCBI  
204 (<ftp://ftp.1000genomes.ebi.ac.uk/vol1/ftp/release/20130502/>)<sup>3</sup>. The linkage  
205 disequilibrium (LD  $r^2$ ) of all SNPs in the mitochondrial genome within  
206 50,000 kb were calculated using the Haploview software<sup>39</sup>. For the Y  
207 chromosome, 200 SNPs were randomly selected from the SNP genotyping  
208 dataset to calculate the LD within 50,000 kb using Haploview. The final  
209 SNP dataset was formed by removing unmatched SNP positions between the  
210 chimpanzee and humans in the LD block. The IBS distance matrix of the  
211 mitochondrial genome and the Y-DNA was computed using PLINK on the  
212 SNP set which was located in the LD block<sup>40</sup>. The same distance matrix was  
213 used to construct a phylogenetic tree by the neighbour-joining method,



214 implementing in PHYLIP and visualised in R<sup>41,42</sup>.

### 215 **Analysis of SNP differences between different groups**

216 Individual-specific SNPs and the number of SNP differences between  
217 each individual and chimpanzee were calculated using a Perl script. When  
218 counting the number of SNP differences, genotypes designated ‘-’, were not  
219 counted. For branches with more than one individual, the average number of  
220 SNP differences over all individuals was calculated.

221

### 222 **Author Contributions**

223 KW conceived, designed and supervised the study, interpreted the data and  
224 wrote the paper; TS conceived the study, conducted most of the analysis and  
225 wrote the paper; QL and MS discussed the results and verified the data. All  
226 authors reviewed and edited the manuscript.

227

### 228 **Competing interests**

229 The authors declare no competing interests.

230

### 231 **Additional files**

232 Supplementary Table S1: Individuals of two branches from each  
233 differentiation node of mtDNA

234 Supplementary Table S2: Individuals of two branches from each  
235 differentiation node of Y-DNA

## 236 References

- 237 1 Poznik, G. D. *et al.* Punctuated bursts in human male demography inferred from  
238 1,244 worldwide Y-chromosome sequences. *Nat Genet* **48**, 593-599,  
239 doi:10.1038/ng.3559 (2016).
- 240 2 Gonder, M. K., Mortensen, H. M., Reed, F. A., de Sousa, A. & Tishkoff, S. A.  
241 Whole-mtDNA genome sequence analysis of ancient African lineages. *Mol Biol Evol*  
242 **24**, 757-768, doi:10.1093/molbev/msl209 (2007).
- 243 3 Altshuler, D. M. *et al.* Integrating common and rare genetic variation in diverse  
244 human populations. *Nature* **467**, 52-58, doi:10.1038/nature09298 (2010).
- 245 4 Spoor, F. *et al.* Implications of new early Homo fossils from Ileret, east of Lake  
246 Turkana, Kenya. *Nature* **448**, 688-691, doi:10.1038/nature05986 (2007).
- 247 5 McDougall, I., Brown, F. H. & Fleagle, J. G. Stratigraphic placement and age of  
248 modern humans from Kibish, Ethiopia. *Nature* **433**, 733-736,  
249 doi:10.1038/nature03258 (2005).
- 250 6 Green, R. E. *et al.* A draft sequence of the Neandertal genome. *Science* **328**, 710-722,  
251 doi:10.1126/science.1188021 (2010).
- 252 7 Hublin, J. J. *et al.* New fossils from Jebel Irhoud, Morocco and the pan-African origin  
253 of Homo sapiens. *Nature* **546**, 289-292, doi:10.1038/nature22336 (2017).
- 254 8 Templeton, A. Out of Africa again and again. *Nature* **416**, 45-51,  
255 doi:10.1038/416045a (2002).
- 256 9 Delson, E. An early modern human outside Africa. *Nature* **571**, 487-488 (2019).
- 257 10 Groucutt, H. S. *et al.* Homo sapiens in Arabia by 85,000 years ago. *Nat Ecol Evol* **2**,  
258 800-809, doi:10.1038/s41559-018-0518-2 (2018).
- 259 11 Bergström, A., Stringer, C., Hajdinjak, M., Scerri, E. M. L. & Skoglund, P. Origins of  
260 modern human ancestry. *Nature* **590**, 229-237, doi:10.1038/s41586-021-03244-5  
261 (2021).
- 262 12 Schuster, S. C. *et al.* Complete Khoisan and Bantu genomes from southern Africa.  
263 *Nature* **463**, 943-947, doi:10.1038/nature08795 (2010).
- 264 13 Poznik, G. D. *et al.* Sequencing Y chromosomes resolves discrepancy in time to  
265 common ancestor of males versus females. *Science* **341**, 562-565,  
266 doi:10.1126/science.1237619 (2013).
- 267 14 Cann, R. L., Stoneking, M. & Wilson, A. C. Mitochondrial DNA and human evolution.  
268 *Nature* **325**, 31-36, doi:10.1038/325031a0 (1987).
- 269 15 Thomson, R., Pritchard, J. K., Shen, P., Oefner, P. J. & Feldman, M. W. Recent common  
270 ancestry of human Y chromosomes: evidence from DNA sequence data. *Proc Natl*  
271 *Acad Sci U S A* **97**, 7360-7365, doi:10.1073/pnas.97.13.7360 (2000).
- 272 16 Wei, W. *et al.* A calibrated human Y-chromosomal phylogeny based on resequencing.  
273 *Genome Res* **23**, 388-395, doi:10.1101/gr.143198.112 (2013).
- 274 17 Cruciani, F. *et al.* A revised root for the human Y chromosomal phylogenetic tree: the  
275 origin of patrilineal diversity in Africa. *Am J Hum Genet* **88**, 814-818,  
276 doi:10.1016/j.ajhg.2011.05.002 (2011).
- 277 18 Stoneking, M. & Soodyall, H. Human evolution and the mitochondrial genome.  
278 *Current opinion in genetics & development* **6**, 731-736,  
279 doi:10.1016/s0959-437x(96)80028-1 (1996).
- 280 19 Zhang, C., Dong, S. S., Xu, J. Y., He, W. M. & Yang, T. L. PopLDdecay: a fast and  
281 effective tool for linkage disequilibrium decay analysis based on variant call format  
282 files. *Bioinformatics* **35**, 1786-1788, doi:10.1093/bioinformatics/bty875 (2019).
- 283 20 Falush, D., Stephens, M. & Pritchard, J. K. Inference of population structure using  
284 multilocus genotype data: linked loci and correlated allele frequencies. *Genetics* **164**,  
285 1567-1587 (2003).
- 286 21 Bromham, L. & Penny, D. The modern molecular clock. *Nat Rev Genet* **4**, 216-224,

- 287 doi:10.1038/nrg1020 (2003).
- 288 22 Venn, O. *et al.* Nonhuman genetics. Strong male bias drives germline mutation in  
289 chimpanzees. *Science* **344**, 1272-1275, doi:10.1126/science.344.6189.1272 (2014).
- 290 23 Reyes-Centeno, H. *et al.* Genomic and cranial phenotype data support multiple  
291 modern human dispersals from Africa and a southern route into Asia. *Proc Natl Acad*  
292 *Sci U S A* **111**, 7248-7253, doi:10.1073/pnas.1323666111 (2014).
- 293 24 Hershkovitz, I. *et al.* The earliest modern humans outside Africa. *Science* **359**,  
294 456-459, doi:10.1126/science.aap8369 (2018).
- 295 25 Harvati, K. *et al.* Apidima Cave fossils provide earliest evidence of Homo sapiens in  
296 Eurasia. *Nature* **571**, 500-504, doi:10.1038/s41586-019-1376-z (2019).
- 297 26 Hublin, J. J. *et al.* Initial Upper Palaeolithic Homo sapiens from Bacho Kiro Cave,  
298 Bulgaria. *Nature* **581**, 299-302, doi:10.1038/s41586-020-2259-z (2020).
- 299 27 Fewlass, H. *et al.* A (14)C chronology for the Middle to Upper Palaeolithic transition  
300 at Bacho Kiro Cave, Bulgaria. *Nat Ecol Evol* **4**, 794-801,  
301 doi:10.1038/s41559-020-1136-3 (2020).
- 302 28 Liu, W. *et al.* The earliest unequivocally modern humans in southern China. *Nature*  
303 **526**, 696-699, doi:10.1038/nature15696 (2015).
- 304 29 Goebel, T., Waters, M. R. & O'Rourke, D. H. The late Pleistocene dispersal of modern  
305 humans in the Americas. *Science* **319**, 1497-1502, doi:10.1126/science.1153569  
306 (2008).
- 307 30 Clark, P. U. *et al.* The Last Glacial Maximum. *Science* **325**, 710-714,  
308 doi:10.1126/science.1172873 (2009).
- 309 31 Ardelean, C. F. *et al.* Evidence of human occupation in Mexico around the Last Glacial  
310 Maximum. *Nature* **584**, 87-92, doi:10.1038/s41586-020-2509-0 (2020).
- 311 32 Leakey, L. S., Tobias, P. V. & Napier, J. R. A NEW SPECIES OF THE GENUS HOMO FROM  
312 OLDUVAI GORGE. *Nature* **202**, 7-9, doi:10.1038/202007a0 (1964).
- 313 33 Grün, R. *et al.* U-series and ESR analyses of bones and teeth relating to the human  
314 burials from Skhul. *J Hum Evol* **49**, 316-334, doi:10.1016/j.jhevol.2005.04.006 (2005).
- 315 34 Carbonell, E. *et al.* The first hominin of Europe. *Nature* **452**, 465-469,  
316 doi:10.1038/nature06815 (2008).
- 317 35 Ayala, F. J. Cloning humans? Biological, ethical, and social considerations. *Proc Natl*  
318 *Acad Sci U S A* **112**, 8879-8886, doi:10.1073/pnas.1501798112 (2015).
- 319 36 Huang, W., Li, L., Myers, J. R. & Marth, G. T. ART: a next-generation sequencing read  
320 simulator. *Bioinformatics* **28**, 593-594, doi:10.1093/bioinformatics/btr708 (2012).
- 321 37 Li, H. & Durbin, R. Fast and accurate long-read alignment with Burrows-Wheeler  
322 transform. *Bioinformatics* **26**, 589-595, doi:10.1093/bioinformatics/btp698 (2010).
- 323 38 McKenna, A. *et al.* The Genome Analysis Toolkit: a MapReduce framework for  
324 analyzing next-generation DNA sequencing data. *Genome Res* **20**, 1297-1303,  
325 doi:10.1101/gr.107524.110 (2010).
- 326 39 Barrett, J. C., Fry, B., Maller, J. & Daly, M. J. Haploview: analysis and visualization of  
327 LD and haplotype maps. *Bioinformatics* **21**, 263-265 (2005).
- 328 40 Purcell, S. *et al.* PLINK: a tool set for whole-genome association and  
329 population-based linkage analyses. *The American journal of human genetics* **81**,  
330 559-575 (2007).
- 331 41 Felsenstein, J. Phylogeny inference package. *Department of Genetics, University of*  
332 *Washington. Seattle* (1993).
- 333 42 Yu, G., Smith, D. K., Zhu, H., Guan, Y. & Lam, T. T. Y. ggtree: an R package for  
334 visualization and annotation of phylogenetic trees with their covariates and other  
335 associated data. *Methods in Ecology and Evolution* **8**, 28-36 (2017).

336

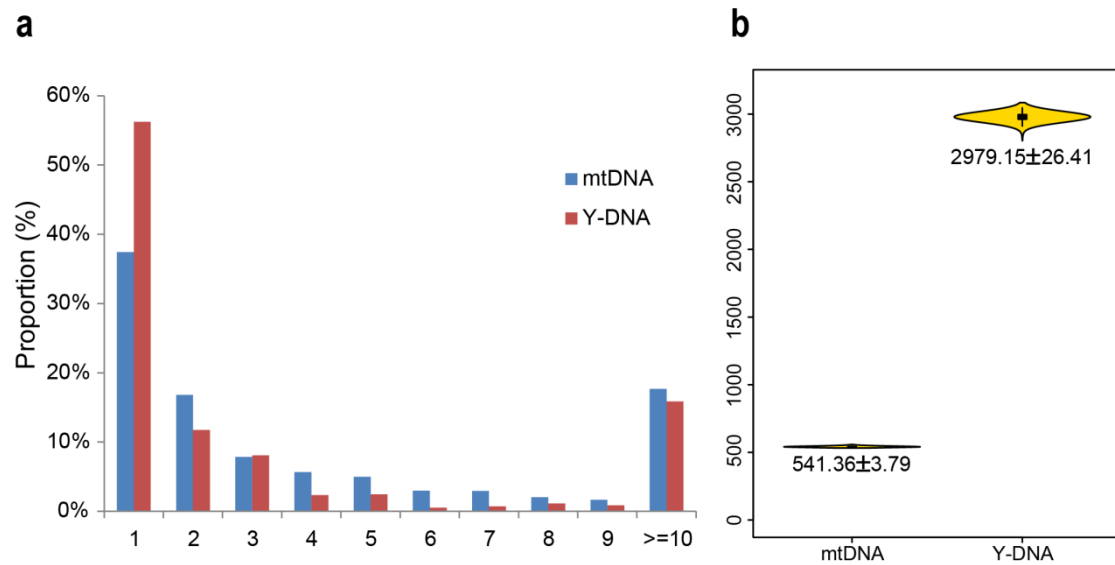

337

338

339 **Figure 1: Analysis of the SNPs specificity and differences in mtDNA and**  
340 **Y-DNA**

341 **a. Proportions of specific SNPs in mtDNA and Y-DNA.** The X-axis  
342 represents the number of individuals sharing the same minority-specific SNP.  
343 The Y-axis represents the proportion of SNPs. **b. SNP differences between**  
344 **all individuals and one chimpanzee.** Black outlines are violin plots. Black  
345 rectangles indicate interquartile ranges, and black lines indicate the 95%  
346 confidence interval. Numbers represent mean  $\pm$ SD.

347

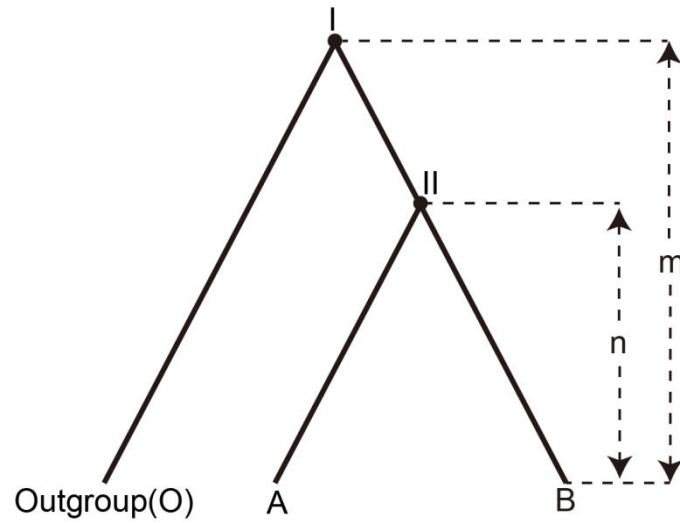

348

349

350 **Figure 2: Time calculation model used in this study**

351 A and B represent two different individuals or groups. Node I represents the  
352 Most Recent Common Ancestor (MRCA) of Out-group (O) and A/B. The  
353 corresponding time is represented as m. Node II represents the MRCA of A  
354 and B, and the corresponding time is indicated as n.

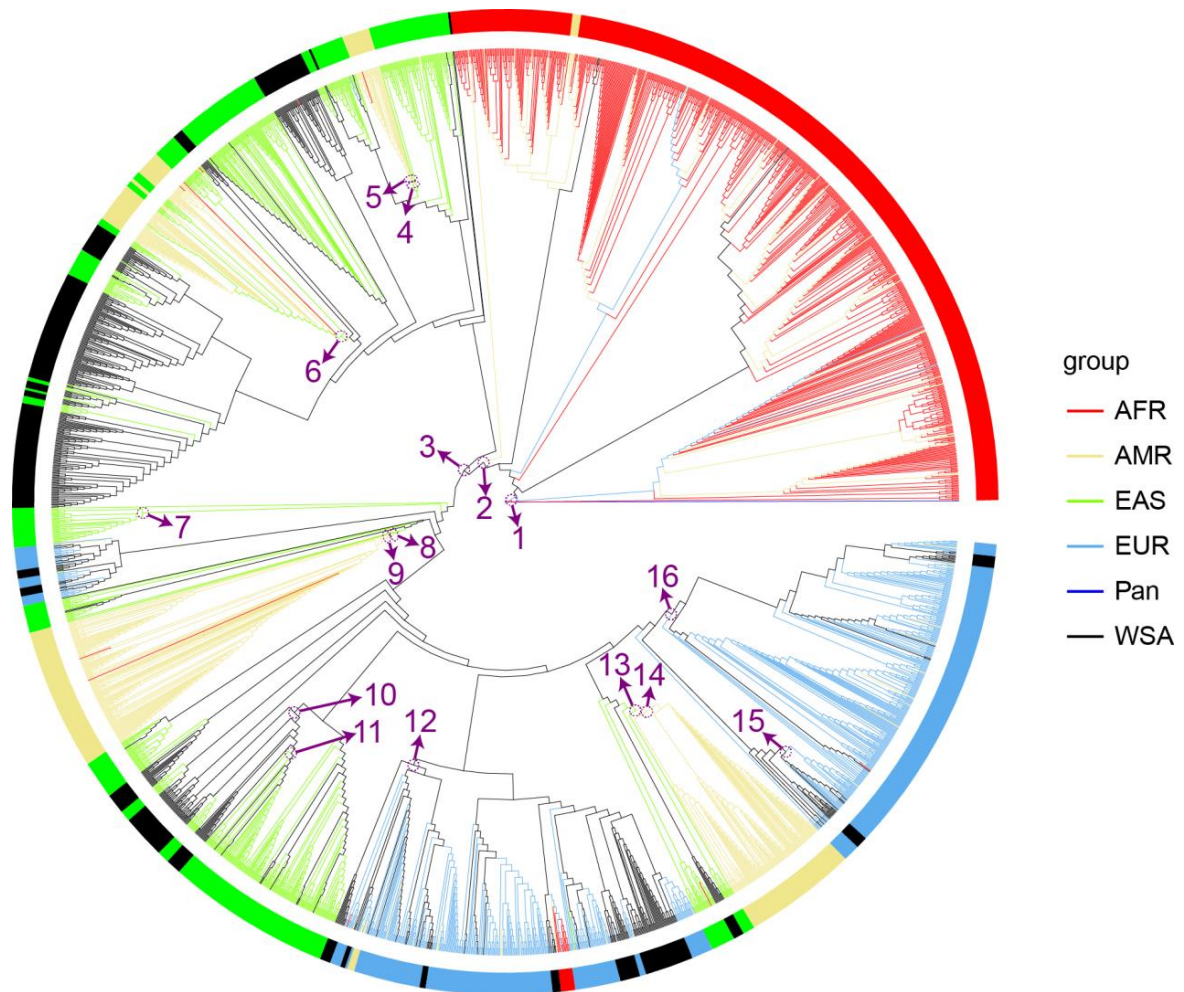

355

356

357 **Figure 3: Evolutionary tree based on mtDNA**

358 Populations from Africa (AFR), America (AMR), East Asia (EAS), Europe  
359 (EUR), West and South Asia (WSA) were used to construct an evolutionary  
360 tree based on mtDNA. Dashed circles and corresponding numbers represent  
361 the differentiation nodes between the two groups.

362

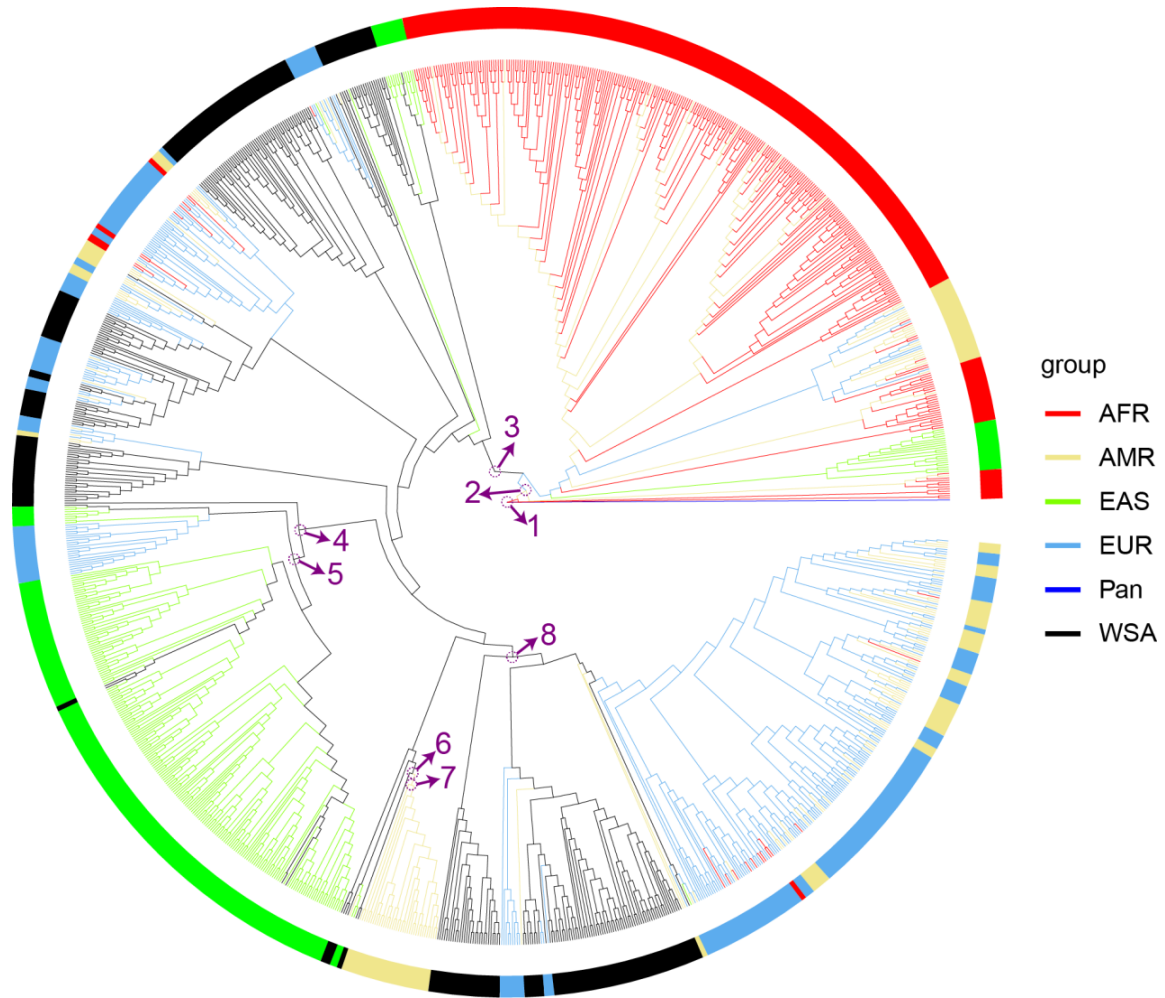

363

364 **Figure 4: Evolutionary tree based on Y-DNA**

365 Populations from Africa (AFR), America (AMR), East Asia (EAS), Europe  
366 (EUR), West and South Asia (WSA) were used to construct an evolutionary  
367 tree based on Y-DNA. Dashed circles and corresponding numbers represent  
368 the differentiation nodes between the two groups.

369

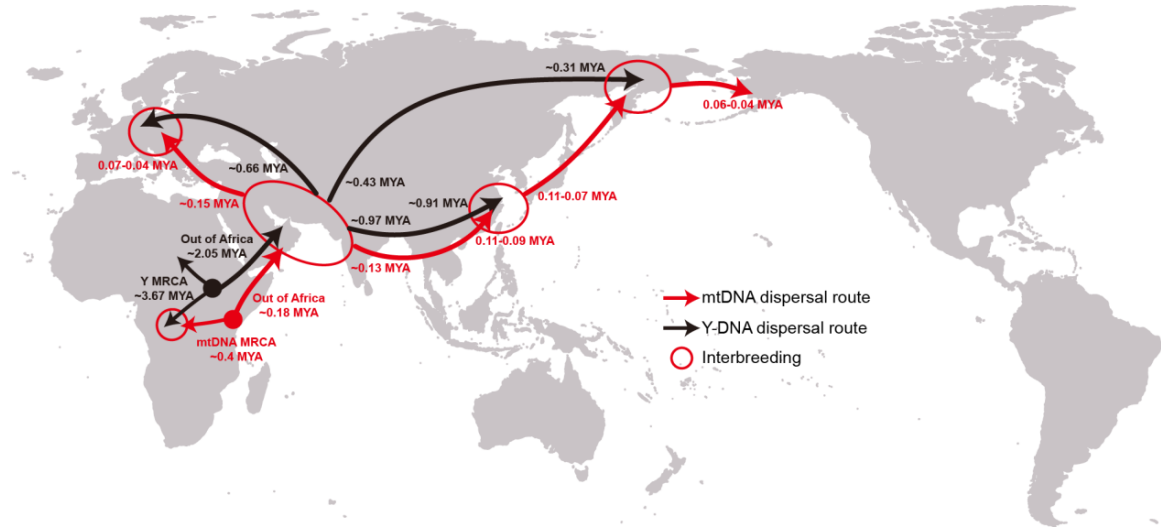

370

371 **Figure 5: Migration routes and times of prehistoric human populations**  
372 **around the world, based on evidence from mtDNA and Y-DNA**

373 Red and black arrows indicate the putative migration routes of mtDNA and  
374 Y-DNA, respectively. The numbers at the end of each arrow indicate the  
375 time when the populations of the two regions began to diverge. The numbers  
376 on the arrows represent the time of the common ancestor of the arriving  
377 region's population. Time unit: million years ago (MYA).



378

379 **Table 1: A proposed migratory timeline for humans migrating across**  
 380 **the world based on evidence from mtDNA**

381

| Events                                       | Node | $N_{AO}$ | $N_{BO}$ | $N_{AB}$ | Corresponding time (MYA) |
|----------------------------------------------|------|----------|----------|----------|--------------------------|
| Common ancestor of all modern humans         | 1    | 541.35   | 542.60   | 43.06    | 0.40                     |
| Human dispersal out of Africa                | 2    | 540.68   | 542.38   | 19.23    | 0.18                     |
| Common ancestor of all non-Africans          | 3    | 539.78   | 542.57   | 19.65    | 0.18                     |
|                                              | 4    | 543.26   | 541.00   | 7.87     | 0.07                     |
| Americans split from East Asians             | 6    | 543.11   | 545.35   | 10.93    | 0.10                     |
|                                              | 8    | 541.14   | 543.00   | 9.27     | 0.09                     |
|                                              | 13   | 539.35   | 537.00   | 11.64    | 0.11                     |
| Common ancestor of Americans                 | 5    | 543.23   | 544.00   | 6.91     | 0.06                     |
|                                              | 9    | 541.13   | 542.00   | 4.29     | 0.04                     |
|                                              | 14   | 540.00   | 539.06   | 5.69     | 0.05                     |
| Common ancestor of East Asians               | 7    | 537.85   | 539.00   | 10.07    | 0.09                     |
|                                              | 11   | 540.81   | 542.13   | 11.83    | 0.11                     |
| East Asians split from West and South Asians | 10   | 541.31   | 540.33   | 13.53    | 0.13                     |
| Europeans split from West and South Asians   | 12   | 542.58   | 537.22   | 15.70    | 0.15                     |
| Common ancestor of Europeans                 | 15   | 535.56   | 536.53   | 4.44     | 0.04                     |
|                                              | 16   | 536.23   | 539.50   | 7.24     | 0.07                     |

382

383  $N_{AO}$ : Mean number of SNPs differences between branch A and Outgroup  
 384 (chimpanzee).

385  $N_{BO}$ : Mean number of SNPs differences between branch B and Outgroup  
 386 (chimpanzee).

387  $N_{AB}$ : Mean number of SNPs differences between branch A and branch B.

388 **Table 2: A proposed migratory time for prehistoric human migration**  
389 **across the world based on evidence from Y-DNA**

390

| Events                                       | Node | $N_{AO}$ | $N_{BO}$ | $N_{AB}$ | Corresponding time (MYA) |
|----------------------------------------------|------|----------|----------|----------|--------------------------|
| Common ancestor of all modern humans         | 1    | 3000.50  | 2979.11  | 2197.19  | 3.67                     |
| Human dispersal out of Africa                | 2    | 2979.27  | 2954.75  | 1216.75  | 2.05                     |
| Common ancestor of all non-Africans          | 3    | 2972.42  | 2996.88  | 918.40   | 1.54                     |
| East Asians split from West and South Asians | 4    | 2970.18  | 2951.00  | 575.35   | 0.97                     |
| Common ancestor of East Asians               | 5    | 2969.86  | 2972.22  | 538.49   | 0.91                     |
| Americans split from West and South Asians   | 6    | 2951.19  | 2958.00  | 255.26   | 0.43                     |
| Common ancestor of Americans                 | 7    | 2950.74  | 2959.00  | 185.65   | 0.31                     |
| Europeans split from West and South Asians   | 8    | 2965.26  | 2984.72  | 391.14   | 0.66                     |

391

392  $N_{AO}$ : Mean number of SNPs differences between branch A and Outgroup  
393 (chimpanzee).

394  $N_{BO}$ : Mean number of SNPs differences between branch B and Outgroup  
395 (chimpanzee).

396  $N_{AB}$ : Mean number of SNPs differences between branch A and branch B.
